# Supplementary material for: Feasibility and Potential Effectiveness of a Smartphone Zero-Time Exercise Intervention for Promoting Physical Activity and Fitness in Patients With Coronary Heart Disease: A Pilot Randomized Controlled Trial
Source: PubMed Central journal article supplement (PMC9330491; doi:10.3389/fpubh.2022.865712), 2022-07-14
Supplement: Table_1.pdf [file Table_1.pdf]

**Supplementary Table I The brief individual face-to-face session for the experimental and control groups**

| <b>The experimental group (n=70)</b>                                                                                                                                                                                                                                                                                                                                                                                                                                                                                                                                                                                                                                                                                                                                                                   |                                                                                                                                                                                                                                                                                                                                                                                                 |
|--------------------------------------------------------------------------------------------------------------------------------------------------------------------------------------------------------------------------------------------------------------------------------------------------------------------------------------------------------------------------------------------------------------------------------------------------------------------------------------------------------------------------------------------------------------------------------------------------------------------------------------------------------------------------------------------------------------------------------------------------------------------------------------------------------|-------------------------------------------------------------------------------------------------------------------------------------------------------------------------------------------------------------------------------------------------------------------------------------------------------------------------------------------------------------------------------------------------|
| <b>Participants received brief ZTEEx-related information (15 min)</b>                                                                                                                                                                                                                                                                                                                                                                                                                                                                                                                                                                                                                                                                                                                                  |                                                                                                                                                                                                                                                                                                                                                                                                 |
| <b>Steps:</b>                                                                                                                                                                                                                                                                                                                                                                                                                                                                                                                                                                                                                                                                                                                                                                                          | <b>Aims:</b>                                                                                                                                                                                                                                                                                                                                                                                    |
| <ol style="list-style-type: none"> <li>1. Briefly discuss with the participants about the risk factors related to coronary heart disease (CHD), and ways of reducing the risks (e.g. increase physical activity)</li> <li>2. Introduce the concepts of ZTEEx and the health benefits of performing ZTEEx.</li> <li>3. Demonstrate the examples of different poses of ZTEEx and invite the participants to perform the ZTEEx together. e.g. hand grip exercise, shoulder raise, pedalling both legs, raising both heels.</li> <li>4. Instruct the participants to use the ZTEExApps for further information on and examples of ZTEEx.</li> <li>5. Suggest participants to perform at least 30 mins per day and record the PA time in the e-dairy in the ZTEEx App.</li> </ol>                           | <ul style="list-style-type: none"> <li>• To increase participants' risk perception on CHD</li> <li>• To enhance positive and realistic outcome expectancies.</li> <li>• To increase the participants' action self-efficacy of being active</li> <li>• To further enhance knowledge on ZTEEx.</li> <li>• To facilitate goal setting and self-monitoring on doing PA, including ZTEEx.</li> </ul> |
| <b>The control group (n=69)</b>                                                                                                                                                                                                                                                                                                                                                                                                                                                                                                                                                                                                                                                                                                                                                                        |                                                                                                                                                                                                                                                                                                                                                                                                 |
| <b>Participants received brief healthy eating and breathing exercise information (15 min)</b>                                                                                                                                                                                                                                                                                                                                                                                                                                                                                                                                                                                                                                                                                                          |                                                                                                                                                                                                                                                                                                                                                                                                 |
| <ol style="list-style-type: none"> <li>1. Briefly discuss with the participants about the risk factors related to coronary heart disease (CHD), and ways of reducing the risks (e.g. healthy eating with low sugar and salt consumption).</li> <li>2. Introduce healthy eating (e.g. low fat, salt &amp; sugar consumption) and its health benefits to promote cardiovascular health.</li> <li>3. Suggest ways of eating healthy (e.g. taking at least 2 servings of fruit and 3 servings of vegetables every day).</li> <li>4. Introduce the benefit of practicing breathing exercises (e.g. relaxation) and invite the participants to perform breathing exercises together.</li> <li>5. Instruct the control participants to perform breathing exercises for at least 30 mins every day.</li> </ol> | <ul style="list-style-type: none"> <li>• To increase the participants' risk perception on CHD</li> <li>• To enhance positive and realistic outcome expectancies from healthy eating</li> <li>• To increase the participants' action self-efficacy of eating healthy</li> </ul>                                                                                                                  |
