# Supplementary material for: Feasibility and Potential Effectiveness of a Smartphone Zero-Time Exercise Intervention for Promoting Physical Activity and Fitness in Patients With Coronary Heart Disease: A Pilot Randomized Controlled Trial
Source: PubMed Central journal article supplement (PMC9330491; doi:10.3389/fpubh.2022.865712), 2022-07-14
Supplement: Table_4.pdf [file Table_4.pdf]

**Supplementary Table 4 Characteristics of the participants who completed the 12-week follow-up (n=113)**

|                                                       | <b>Experimental group<br/>(n=56)</b> | <b>Control group<br/>(n=57)</b> | <b>P-value</b> |
|-------------------------------------------------------|--------------------------------------|---------------------------------|----------------|
|                                                       | <b>n (%)</b>                         | <b>n (%)</b>                    |                |
| <b>Sex</b>                                            |                                      |                                 |                |
| Female                                                | 19 (33.9)                            | 13 (22.8)                       | 0.19           |
| Male                                                  | 37 (66.1)                            | 44 (77.2)                       |                |
| <b>Age, years<sup>#</sup></b>                         | 60.1 ± 6.6                           | 60.4 ± 6.6                      | 0.83           |
| <b>Body Mass Index (kg/m<sup>2</sup>)<sup>#</sup></b> | 25.9 ± 3.4                           | 27.1 ± 3.3                      | 0.06           |
| <b>Marital status</b>                                 |                                      |                                 |                |
| Single/divorced                                       | 9 (16.1)                             | 13 (22.8)                       | 0.37           |
| Married                                               | 47 (83.9)                            | 44 (77.2)                       |                |
| <b>Working status</b>                                 |                                      |                                 |                |
| Retired, unemployed, or working part-time             | 30 (53.6)                            | 33 (57.9)                       | 0.64           |
| Working full-time                                     | 26 (46.4)                            | 24 (42.1)                       |                |
| <b>Smoking status</b>                                 |                                      |                                 |                |
| Never smokers                                         | 38 (67.9)                            | 35 (61.4)                       | 0.64           |
| Smokers and ex-smokers                                | 17 (30.4)                            | 19 (33.3)                       |                |
| Missing data                                          | 1 (1.8)                              | 3 (5.3)                         |                |

<sup>#</sup> Presented as mean ± SD
