# Supplementary material for: Feasibility and Potential Effectiveness of a Smartphone Zero-Time Exercise Intervention for Promoting Physical Activity and Fitness in Patients With Coronary Heart Disease: A Pilot Randomized Controlled Trial
Source: PubMed Central journal article supplement (PMC9330491; doi:10.3389/fpubh.2022.865712), 2022-07-14
Supplement: Table_5.pdf [file Table_5.pdf]

**Supplementary Table 5 Exercise self-efficacy and intention, physical fitness, perceived happiness and health, and quality of life of the experimental and control groups at baseline and 12-week follow-up by per-protocol analysis (n=113)**

|                                             | Experimental group (n=56) |                   |                         |           | Control group (n=57) |                   |                         |           | Between-group comparison at 12-week FU |                   |           |
|---------------------------------------------|---------------------------|-------------------|-------------------------|-----------|----------------------|-------------------|-------------------------|-----------|----------------------------------------|-------------------|-----------|
|                                             | Baseline                  | 12-week follow-up | Within-group difference |           | Baseline             | 12-week follow-up | Within-group difference |           | Adjusted mean difference (95% CI)      | P-value           | Cohen's d |
|                                             | Mean ± SD                 | Mean ± SD         | P-value                 | Cohen's d | Mean ± SD            | Mean ± SD         | P-value                 | Cohen's d |                                        |                   |           |
| <b>Exercise self-efficacy and intention</b> |                           |                   |                         |           |                      |                   |                         |           |                                        |                   |           |
| Knowledge of ZTEX                           | 7.1 ± 2.7                 | 7.8 ± 1.7         | 0.07                    | 0.25      | ---                  | ---               | ---                     | ---       | ---                                    | ---               | ---       |
| Self-efficacy of doing ZTEX                 | 6.7 ± 2.2                 | 6.7 ± 1.8         | 0.91                    | 0.02      | ---                  | ---               | ---                     | ---       | ---                                    | ---               | ---       |
| Expectancy on ZTEX                          | 7.2 ± 2.2                 | 7.6 ± 1.9         | 0.24                    | 0.16      | ---                  | ---               | ---                     | ---       | ---                                    | ---               | ---       |
| Plan of doing ZTEX                          | 7.1 ± 2.3                 | 6.9 ± 2.0         | 0.51                    | -0.09     | ---                  | ---               | ---                     | ---       | ---                                    | ---               | ---       |
| <b>Physical fitness</b>                     |                           |                   |                         |           |                      |                   |                         |           |                                        |                   |           |
| <b>Body composition</b>                     |                           |                   |                         |           |                      |                   |                         |           |                                        |                   |           |
| Bodyweight, Kg                              | 70.1 ± 12.0               | 70.1 ± 11.9       | 0.98                    | 0.00      | 74.3 ± 11.7          | 74.1 ± 11.6       | 0.49                    | -0.02     | 0.08 (-0.57, 0.74)                     | 0.81              | 0.04      |
| Body fat, %                                 | 30.3 ± 5.8                | 29.9 ± 6.4        | 0.30                    | -0.14     | 29.2 ± 5.6           | 29.0 ± 5.5        | 0.75                    | -0.04     | -0.24 (-1.30, 0.81)                    | 0.65              | -0.08     |
| Waist circumference, cm                     | 92.4 ± 10.2               | 91.8 ± 9.8        | 0.13                    | -0.06     | 96.3 ± 10.2          | 96.4 ± 8.6        | 0.84                    | 0.02      | -1.40 (-2.96, 0.17)                    | 0.08              | -0.32     |
| <b>Muscle strength</b>                      |                           |                   |                         |           |                      |                   |                         |           |                                        |                   |           |
| Handgrip test (right), kg                   | 30.2 ± 20.7               | 27.7 ± 7.8        | 0.32                    | -0.16     | 28.4 ± 9.5           | 29.5 ± 10.2       | 0.13                    | 0.11      | -1.36 (-3.97, 1.26)                    | 0.31              | -0.18     |
| Handgrip test (left), kg                    | 26.9 ± 9.0                | 26.9 ± 7.9        | 0.98                    | 0.00      | 26.8 ± 9.7           | 27.2 ± 9.9        | 0.60                    | 0.04      | -0.02 (-1.89, 1.85)                    | 0.98              | 0.00      |
| 30-sec chair stand test, no. of stands      | 15.6 ± 7.1                | 17.7 ± 6.5        | 0.01*                   | 0.30      | 15.2 ± 4.3           | 15.9 ± 5.2        | 0.20                    | 0.16      | 1.32 (-0.46, 3.10)                     | 0.15              | 0.27      |
| <b>Perceived happiness and health</b>       |                           |                   |                         |           |                      |                   |                         |           |                                        |                   |           |
| Perceived happiness                         | 6.8 ± 1.7                 | 7.3 ± 1.7         | <0.001***               | 0.33      | 7.2 ± 2.0            | 7.4 ± 1.9         | 0.39                    | 0.09      | 0.24 (-0.22, 0.70)                     | 0.30              | 0.19      |
| Perceived health                            | 6.3 ± 2.0                 | 6.2 ± 1.7         | 0.80                    | -0.03     | 6.2 ± 1.8            | 6.4 ± 2.1         | 0.44                    | 0.13      | -0.22 (-0.87, 0.43)                    | 0.51              | -0.12     |
| <b>Quality of life</b>                      |                           |                   |                         |           |                      |                   |                         |           |                                        |                   |           |
| Physical health                             | 14.4 ± 1.5                | 15.4 ± 1.9        | <0.001***               | 0.60      | 14.2 ± 2.1           | 15.0 ± 2.1        | 0.005**                 | 0.37      | 0.36 (-0.30, 1.03)                     | 0.28              | 0.20      |
| Psychological                               | 13.0 ± 1.5                | 15.3 ± 2.3        | <0.001***               | 1.18      | 12.6 ± 2.0           | 14.8 ± 2.5        | <0.001***               | 0.96      | 0.27 (-0.55, 1.09)                     | 0.52              | 0.12      |
| Social Relationships                        | 14.9 ± 2.1                | 15.0 ± 2.2        | 0.63                    | 0.07      | 14.9 ± 2.7           | 14.1 ± 2.2        | 0.01*                   | -0.32     | 0.93 (0.22, 1.65)                      | 0.01 <sup>#</sup> | 0.47      |
| Environment                                 | 15.3 ± 1.8                | 15.6 ± 1.8        | 0.26                    | 0.16      | 14.9 ± 2.3           | 14.8 ± 2.1        | 0.62                    | -0.06     | 0.61 (-0.02, 1.24)                     | 0.06              | 0.35      |

ZTEX: Zero-time exercise refers to simple strength- and stamina-enhancing physical activity

Exercise self-efficacy and intention regarding ZTEX using a scale of 0-10 for each question; higher scores indicate better outcomes.

Perceived happiness and health using a scale of 0-10; higher scores indicate better outcomes.

Quality of life using a WHO Quality of Life-Short Form (WHOQOL-BREF) with a 5-point Likert scale, higher scores indicate better quality of life.

Within-group comparison during the 12-week follow-up was increased by paired sample t-test; \*P <0.05, \*\*\* P <0.001

The between-group comparison was done by linear mixed model, adjusted for age, sex and baseline values; <sup>#</sup>P <0.05

Effect size (Cohen's d): small, 0.2; moderate, 0.5; large, 0.8
